# Supplementary material
Source: MDPI journal article supplement (https://www.mdpi.com/2073-4433/12/7/904)
Supplement: s1 [file s1]

# Supplementary Materials: Urban-induced changes on local circulation in complex terrain: Central Mexico Basin

Lourdes P. Aquino-Martínez <sup>1</sup>, Arturo I. Quintanar <sup>2</sup><sup>\*</sup>, Carlos A. Ochoa-Moya <sup>2</sup>, Erika Danaé López Espinoza <sup>2</sup>, David K. Adams <sup>2</sup> and Aron Jazcilevich-Diamant <sup>2</sup>

**Table S1:** Station locations.

| ID   | Lat (°N) | Lat (°W) | Elev (m) | Station                    |
|------|----------|----------|----------|----------------------------|
| ACO  | 19.64    | 98.91    | 2198     | ACOLMAN                    |
| AJU  | 19.15    | 99.16    | 2942     | AJUSCO                     |
| AJM  | 19.27    | 99.21    | 2548     | AJUSCO MEDIO               |
| CHO  | 19.27    | 98.89    | 2253     | CHALCO                     |
| CUA  | 19.37    | 99.29    | 2704     | CUAJIMALPA                 |
| CUT  | 19.72    | 99.20    | 2263     | CUAUTITLAN                 |
| FAC  | 19.48    | 99.24    | 2299     | FES ACATLAN                |
| GAM  | 19.48    | 99.09    | 2227     | GUSTAVO A. MADERO          |
| HGM  | 19.41    | 99.15    | 2234     | HOSPITAL GENERAL           |
| LAA  | 19.48    | 99.15    | 2255     | LAB. DE ANALISIS AMBIENTAL |
| MER  | 19.42    | 99.12    | 2245     | MERCED                     |
| MGH  | 19.40    | 99.20    | 2327     | MIGUEL HIDALGO             |
| MPA  | 19.18    | 98.99    | 2594     | MILPA ALTA                 |
| NEZ  | 19.39    | 99.03    | 2235     | NEXAHUALCOYOTL             |
| PED  | 19.33    | 99.20    | 2326     | PEDREGAL                   |
| SFE  | 19.36    | 99.26    | 2599     | SANTA FE                   |
| TAH  | 19.25    | 99.01    | 2297     | TLAHUAC                    |
| UAX  | 19.30    | 99.10    | 2246     | UAM XOCHIMILCO             |
| UIZ  | 19.36    | 99.07    | 2221     | UAM IZTAPALAPA             |
| VIF  | 19.66    | 99.10    | 2242     | VILLA DE LAS FLORES        |
| XAL  | 19.53    | 99.08    | 2160     | XALOSTOC                   |
| 059  | 19.50    | 99.15    | 2240     | ENCB II                    |
| 061  | 19.39    | 99.10    | 2358     | TEZONTLE                   |
| 095  | 19.12    | 98.66    | 4007     | ALTZOMONI                  |
| 097  | 19.54    | 99.52    | 3754     | CERRO CATEDRAL             |
| 099  | 19.10    | 98.64    | 3682     | PARQUE IXTA-POPOCATEPETL   |
| 100  | 19.52    | 99.27    | 2364     | PRESA MADIN                |
| RAS  | 19.40    | 99.20    | 2313     | RADIOSONDE                 |
| RAWP | 19.48    | 99.14    | 2255     | RADAR WIND PROFILER        |

**Table S2:** Taylor metrics(denoted by the first letter) correlation coefficient (R), root mean square error (S) and bias relative to observations (B), the second letter indicates the meteorological variable: T for temperature at 2m ( $^{\circ}\text{C}$ ), U for u-horizontal wind ( $\text{ms}^{-1}$ ) and V for v-horizontal wind ( $\text{ms}^{-1}$ ), for CTRL experiment.

| ID  | RT    | ST    | BT     | RU     | SU    | BU     | RV     | SV    | BV     |
|-----|-------|-------|--------|--------|-------|--------|--------|-------|--------|
| ACO | 0.969 | 0.982 | -2.241 | 0.335  | 0.883 | 0.048  | -0.234 | 1.379 | 0.768  |
| AJU | 0.926 | 0.543 | 2.949  | 0.707  | 2.333 | -0.108 | 0.720  | 1.020 | -1.209 |
| AJM | 0.981 | 1.004 | 0.538  | 0.861  | 0.745 | -0.919 | 0.229  | 0.667 | -0.247 |
| CHO | 0.990 | 0.753 | 0.410  | 0.717  | 1.335 | -0.090 | 0.855  | 2.125 | -0.027 |
| CUA | 0.955 | 0.940 | 0.918  | 0.536  | 0.933 | -0.304 | 0.457  | 0.660 | -0.397 |
| CUT | 0.952 | 0.790 | -0.104 | 0.380  | 1.223 | -0.160 | 0.724  | 1.417 | -1.120 |
| FAC | 0.893 | 0.615 | -0.368 | 0.668  | 0.799 | -0.525 | -0.340 | 1.060 | -1.275 |
| GAM | 0.974 | 0.907 | -0.557 | 0.141  | 0.582 | -0.375 | 0.522  | 1.017 | -0.141 |
| HGM | 0.974 | 0.938 | -0.957 | 0.180  | 1.147 | -0.775 | -0.400 | 1.730 | -0.354 |
| LAA | 0.984 | 0.944 | 1.053  | 0.433  | 1.005 | -0.427 | 0.100  | 1.123 | 0.105  |
| MER | 0.985 | 0.946 | -0.482 | 0.509  | 0.963 | -0.015 | 0.247  | 2.091 | 0.283  |
| MGH | 0.969 | 0.973 | -0.702 | 0.698  | 0.730 | 0.114  | 0.315  | 0.981 | -0.682 |
| MPA | 0.947 | 0.759 | -0.933 | 0.650  | 0.701 | 0.339  | 0.803  | 0.848 | 0.023  |
| NEZ | 0.986 | 0.880 | -0.239 | 0.591  | 0.784 | 0.449  | 0.739  | 1.015 | 0.241  |
| PED | 0.963 | 0.901 | -0.199 | 0.791  | 0.743 | -0.786 | 0.025  | 1.009 | -1.039 |
| SFE | 0.952 | 0.894 | 0.614  | 0.739  | 0.804 | -0.681 | 0.107  | 0.580 | -0.904 |
| TAH | 0.952 | 0.698 | 0.839  | 0.526  | 0.961 | 0.418  | 0.347  | 1.153 | 0.313  |
| UAX | 0.969 | 0.777 | 1.108  | 0.422  | 1.093 | -0.112 | 0.079  | 1.291 | -0.612 |
| UIZ | 0.982 | 0.903 | -0.795 | 0.385  | 1.003 | -0.006 | 0.425  | 1.309 | -0.048 |
| VIF | 0.954 | 1.061 | -3.290 | 0.268  | 1.149 | -0.005 | 0.729  | 2.817 | -0.241 |
| XAL | 0.980 | 0.969 | -0.645 | 0.037  | 0.554 | -0.255 | 0.705  | 0.968 | -0.151 |
| 059 | 0.949 | 0.755 | -1.888 | 0.555  | 0.214 | -0.586 | 0.490  | 0.441 | 1.821  |
| 061 | 0.955 | 0.920 | -1.020 | -0.653 | 0.906 | 0.074  | 0.481  | 1.098 | -0.612 |
| 095 | 0.921 | 0.620 | -3.316 | 0.407  | 0.125 | 8.269  | -0.274 | 0.413 | -3.575 |
| 097 | 0.915 | 1.279 | -2.689 | -0.243 | 0.503 | 3.919  | 0.297  | 0.180 | 5.241  |
| 099 | 0.950 | 1.016 | -4.778 | 0.356  | 0.188 | 4.107  | -0.377 | 0.408 | -3.083 |
| 100 | 0.904 | 0.702 | 1.348  | 0.868  | 0.174 | -2.126 | -0.055 | 0.598 | 1.399  |
| CCA | 0.950 | 0.813 | 0.780  | 0.714  | 0.961 | -0.161 | -0.086 | 2.052 | -0.556 |

**Table S3:** Hourly Taylor metrics(denoted by the first letter) correlation coefficient (R), root mean square error (S) and bias relative to observations (B), the second letter indicates the meteorological variable: T for temperature at 2m ( °C), U for u-horizontal wind (  $ms^{-1}$ ) and V for v-horizontal wind (  $ms^{-1}$ ), for CTRL experiment.

| HR | RT    | ST    | BT     | RU     | SU    | BU     | RV     | SV    | BV     |
|----|-------|-------|--------|--------|-------|--------|--------|-------|--------|
| 00 | 0.860 | 1.153 | 0.073  | 0.197  | 0.124 | 1.208  | -0.220 | 0.416 | -1.736 |
| 01 | 0.845 | 1.185 | 0.174  | 0.334  | 0.201 | 1.367  | -0.095 | 0.402 | -0.922 |
| 02 | 0.823 | 1.212 | 0.500  | 0.393  | 0.215 | 1.123  | 0.060  | 0.551 | -0.726 |
| 03 | 0.785 | 1.169 | 0.764  | 0.370  | 0.186 | 1.093  | 0.110  | 0.415 | -1.055 |
| 04 | 0.772 | 1.203 | 0.992  | 0.352  | 0.206 | 0.781  | 0.119  | 0.345 | -1.179 |
| 05 | 0.711 | 1.210 | 1.111  | 0.370  | 0.237 | 0.738  | 0.003  | 0.314 | -1.111 |
| 06 | 0.651 | 1.239 | 1.280  | 0.235  | 0.226 | 0.285  | 0.235  | 0.383 | -0.838 |
| 07 | 0.554 | 1.343 | 0.822  | 0.351  | 0.249 | 0.654  | 0.077  | 0.292 | -0.758 |
| 08 | 0.390 | 0.944 | -0.509 | 0.415  | 0.207 | 0.962  | 0.148  | 0.433 | -0.302 |
| 09 | 0.377 | 1.030 | -1.946 | 0.552  | 0.179 | 1.277  | -0.055 | 0.292 | -0.607 |
| 10 | 0.403 | 0.983 | -2.279 | 0.610  | 0.231 | 1.355  | 0.554  | 0.274 | -0.380 |
| 11 | 0.648 | 1.082 | -2.578 | 0.642  | 0.261 | 0.740  | 0.370  | 0.320 | -0.244 |
| 12 | 0.804 | 1.134 | -2.703 | 0.710  | 0.271 | 1.057  | 0.511  | 0.393 | -0.104 |
| 13 | 0.854 | 1.208 | -2.735 | 0.631  | 0.273 | 1.379  | 0.548  | 0.461 | 0.101  |
| 14 | 0.885 | 1.247 | -2.324 | 0.553  | 0.349 | 1.209  | 0.720  | 0.481 | 0.463  |
| 15 | 0.910 | 1.219 | -1.737 | 0.594  | 0.351 | 0.797  | 0.554  | 0.805 | 1.066  |
| 16 | 0.945 | 1.111 | -1.015 | 0.029  | 0.349 | -0.983 | 0.421  | 0.743 | 1.738  |
| 17 | 0.957 | 1.054 | -0.448 | 0.439  | 0.631 | -1.137 | 0.601  | 0.701 | 2.022  |
| 18 | 0.965 | 0.983 | 0.230  | 0.483  | 0.750 | -1.619 | 0.684  | 0.806 | 1.751  |
| 19 | 0.909 | 1.124 | -0.045 | 0.458  | 0.472 | -0.673 | 0.561  | 1.079 | 0.219  |
| 20 | 0.850 | 1.128 | -0.374 | 0.381  | 0.502 | -0.818 | 0.530  | 0.978 | -0.647 |
| 21 | 0.853 | 1.067 | -0.332 | 0.388  | 0.466 | -1.748 | 0.073  | 0.707 | -0.906 |
| 22 | 0.866 | 1.025 | 0.026  | 0.059  | 0.252 | -0.886 | 0.013  | 0.343 | -0.502 |
| 23 | 0.840 | 1.012 | 0.498  | -0.058 | 0.182 | -0.171 | 0.127  | 0.293 | -0.554 |

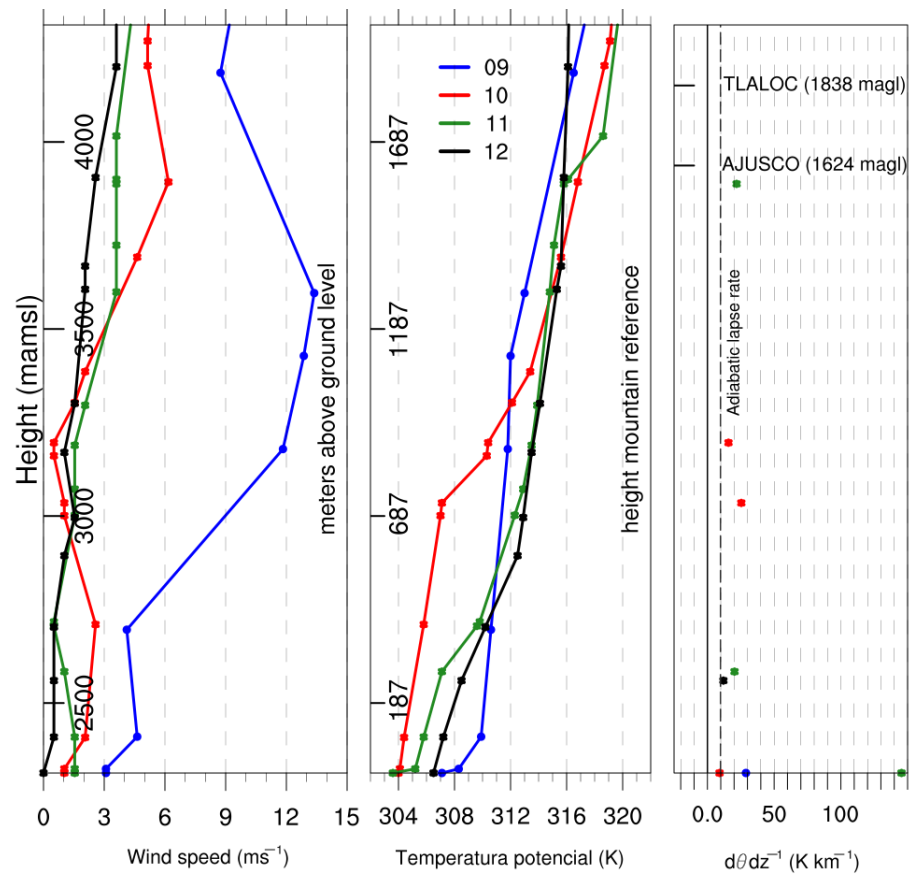

**Figure S1.** Wind speed ( $m s^{-1}$ ),  $\theta$  (K) and  $d\theta/dz$  ( $K km^{-1}$ ) profiles from radiosonde at 1200 UTC (0600 LST) in 09 to 12 February, 2017.

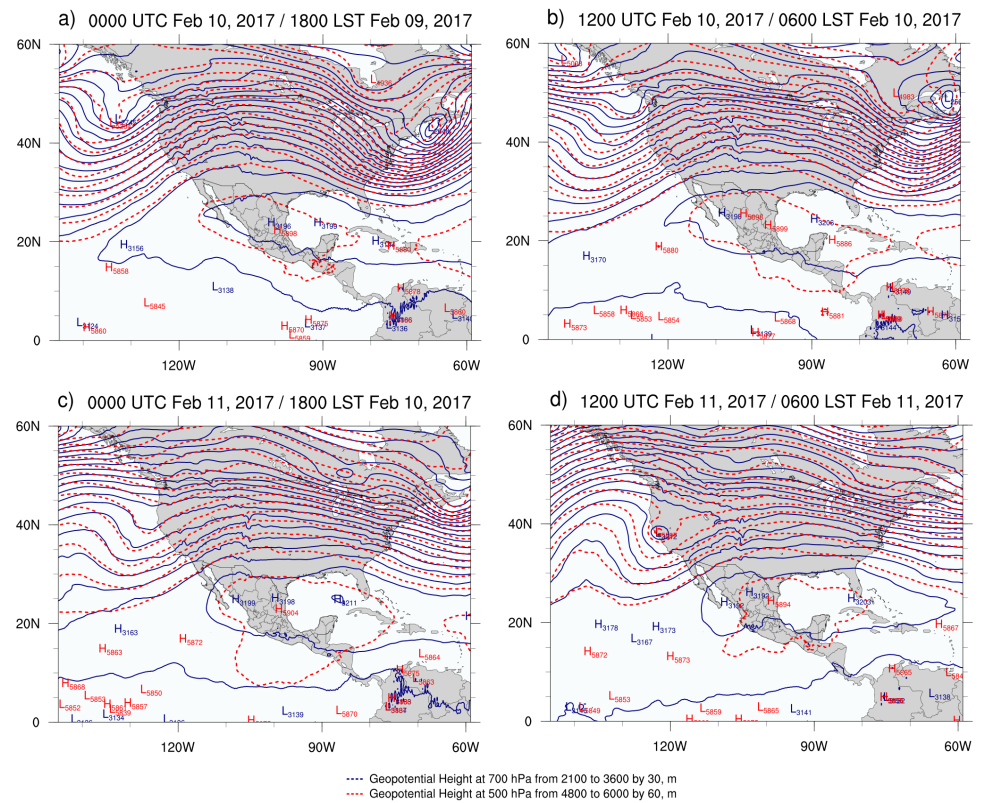

**Figure S2.** Synoptic weather conditions from ERA5 reanalysis showing geopotential height at 700 hPa (blue lines) and 500 hPa (red lines), at (a) 0000 UTC 10 Feb (18 LST 09 Feb), (b) 1200 UTC 10 Feb (0600 LST 09 Feb), (c) 0000 UTC 11 Feb (1800 LST 10 Feb) and (d) 1200 UTC 11 Feb (0600 LST 11 Feb).

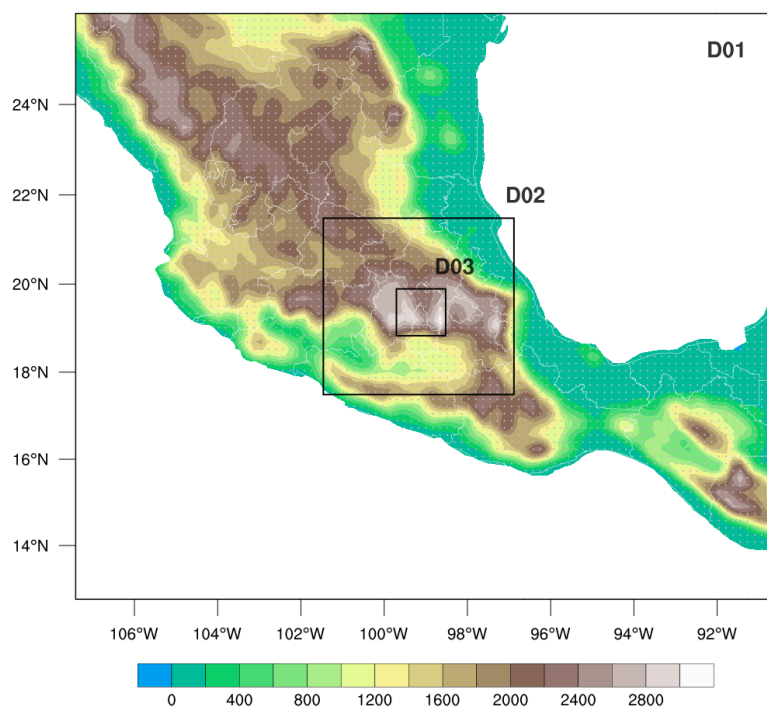

**Figure S3.** Computational domain distribution covering the Mexico and the Mexico Basin (domain D03) for the WRF model. Domains D01, D02 and D03 have a horizontal resolution of 18, 6 and 2 km respectively.

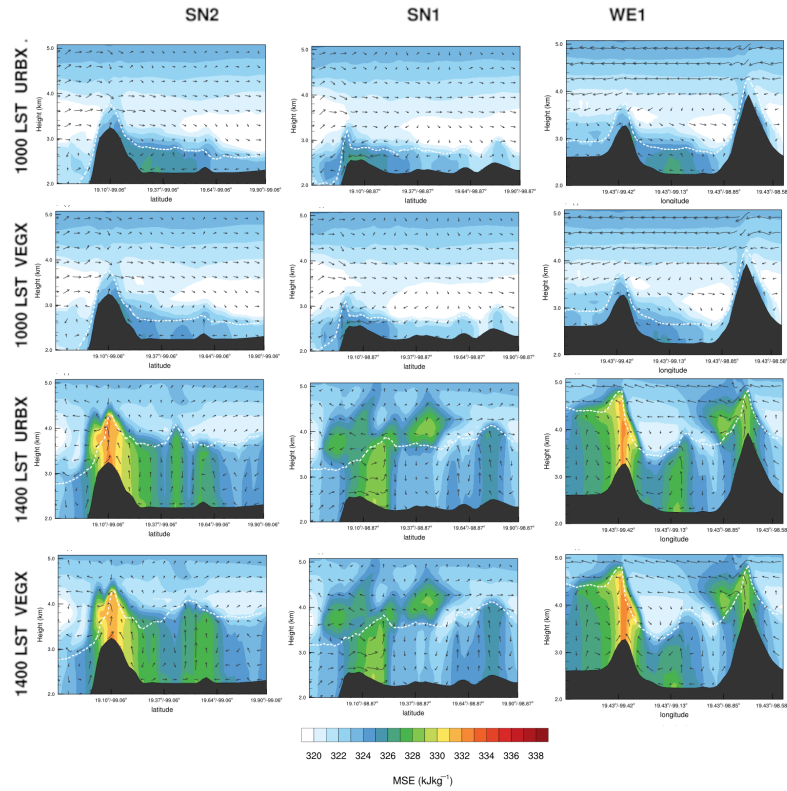

**Figure S4.** Vertical cross-sections of moist static energy in the URBX, and VEGX simulations for 10 February, 2017 at 1000 and 1400 LST. Each panel column represents a transect as defined in Figure 1 of the manuscript. The wind field pattern is represented by the vertical and meridional components of the wind for the south-north transects (SN1, and SN2) and zonal wind component for the west-east transect (WE1). In order to facilitate inspection of the fields, the vertical wind component is multiplied by a factor of 10 and the vertical scale is exaggerated compared to the horizontal scale. The white line represents the height in m amsl of the PBL, from the model simulation.

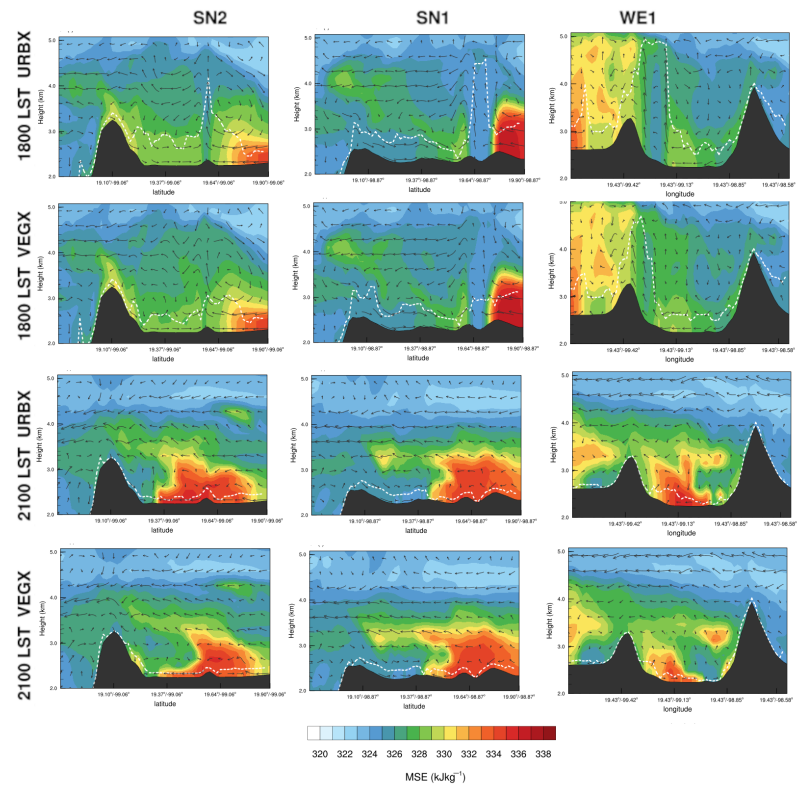

**Figure S5.** Same as Figure S5, except for 1800 and 2100 LST.



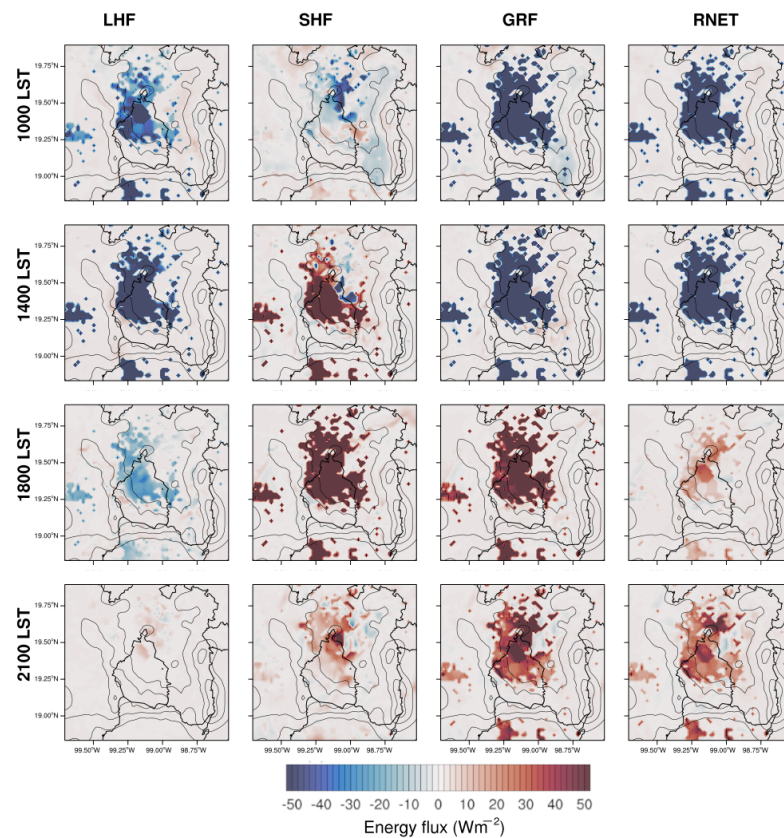

**Figure S6.** Urban effect as the difference in energy fluxes  $\text{W m}^{-2}$  at the surface between the URBX simulation and the VEGX experiment for 10 February at 1000, 1400, 1800, and 2100 LST. Columns 1, 2, 3 and 4 are for latent heat fluxes (LHF), sensible heat fluxes (SHF), ground flux (GRF), and net radiation, respectively. Positive direction for fluxes implies atmosphere receives energy from the surface below.
